# Supplementary material for: A class I cytosolic HSP20 of rice enhances heat and salt tolerance in different organisms
Source: PubMed Central journal article supplement (PMC6987133; doi:10.1038/s41598-020-58395-8), 2020-01-28

# **A class I cytosolic HSP20 of rice enhances heat and salt tolerance in different organisms**

**Liu-Ming Guo**<sup>1,2, §</sup>, **Jing Li**<sup>1, §</sup>, **Jing He**<sup>1,2</sup>, **Han Liu**<sup>1,2</sup>, **Heng-Mu Zhang**<sup>1,2, \*</sup>

<sup>1</sup> Institute of Virology and Biotechnology, Zhejiang Academy of Agricultural Sciences, Hangzhou 310021, China

<sup>2</sup> College of Chemistry and Life Science, Zhejiang Normal University, Jinhua 321004, China;

**§The first two authors contributed equally to this work**

**\* Correspondence:** Corresponding authors, E-mail: [zhengmu@tsinghua.org.cn](mailto:zhengmu@tsinghua.org.cn)

**Running title:** Chaperone activity of OsHSP20

## Supplementary materials

**Table S1** Primers used in plasmid construction

| Primers     | Sequences (5'-3')                       | Restriction sites <sup>1</sup> |
|-------------|-----------------------------------------|--------------------------------|
| YOs20-NF    | GGAATTCCATATGTCGCTGATCCGCCGC            | <i>NdeI</i>                    |
| YOs20-NR    | CGCGGATCCCTACTTGAACACGTGCGCCTC          | <i>BamHI</i>                   |
| Y-Os20-ACDF | GGAATTCCATATGTCCTCCGAGACCGCGGCC         | <i>NdeI</i>                    |
| Y-Os20-ACDR | CGCGGATCCCTAGACGTCGGGCTTCTTGGC          | <i>BamHI</i>                   |
| YOs20-CF    | GGAATTCCATATGCAGGAGGAGAAGACGGAC         | <i>NdeI</i>                    |
| Y-Os20-CR   | CGCGGATCCCTAGCCGGAGATCTGGATGGA          | <i>BamHI</i>                   |
| PE-Os20-NF  | CGAGCTCATGTCGCTGATCCGCCGC               | <i>SacI</i>                    |
| PEOs20-NR   | AAGGAAAAAAGCGGCCGCCTACTTGAACACGTGCGCCTC | <i>NotI</i>                    |
| PEOs20-ACDF | CGAGCTCATGTCCTCCGAGACCGCGGCC            | <i>SacI</i>                    |
| PEOs20-ACDR | AAGGAAAAAAGCGGCCGCCTAGACGTCGGGCTTCTTGGC | <i>NotI</i>                    |
| PEOs20-CF   | CGAGCTCATGCAGGAGGAGAAGACGGAC            | <i>SacI</i>                    |
| PEOs20-CR   | AAGGAAAAAAGCGGCCGCCTAGCCGGAGATCTGGATGGA | <i>NotI</i>                    |
| Trs20-F     | CGGAGCTCATGTCGCTGATCCGCCGCAG            | <i>SacI</i>                    |
| Trs20-R     | CGCGGATCCCTAGCCGGAGATCTGGATGGAC         | <i>BamHI</i>                   |

<sup>1</sup>, underlined

**Figure S1** Characterization of recombinant OsHSP20 in *E. coli*. (A) Heterologous expression of the intact OsHSP20 and its truncated proteins in *E. coli* assessed by SDS-PAGE analysis and Coomassie brilliant blue staining. Line M, protein molecular weight marker; Lane 1: whole cell lysate of non-induced cells containing the empty vector pET32a(+); Lane 2: whole cell lysate of cells containing the empty vector induced with 1 mM IPTG; Lane 3: whole cell lysate of cells containing pET32a-OsHSP20<sup>N</sup> induced with 1 mM IPTG; Lane 4: whole cell lysate of cells containing pET32a-OsHSP20<sup>ACD</sup> induced with 1 mM IPTG; Lane 5: whole cell lysate of cells containing pET32a-OsHSP20<sup>C</sup> induced with 1 mM IPTG; Lane 6: whole cell lysate of cells containing pET32a-OsHSP20<sup>N+ACD</sup> induced with 1 mM IPTG. Lane 7: whole cell lysate of cells containing pET32a-OsHSP20<sup>ACD+C</sup> induced with 1 mM IPTG. Lane 8: whole cell lysate of cells containing pET32a-OsHSP20<sup>Full</sup> induced with 1 mM IPTG. The induced proteins are indicated by black arrows. (B) Western blot analysis of purified recombinant OsHSP20 proteins using anti-His-tag monoclonal antibody. Antibodies were used in dilutions of 1:5000. Lane M, protein molecular weight marker; Lane 1, purified recombinant His-OsHSP20<sup>N</sup> protein; Lane 2, purified recombinant His-OsHSP20<sup>ACD</sup> protein; Lane 3, purified recombinant His-OsHSP20<sup>C</sup> protein; Lane 4, purified recombinant His-OsHSP20<sup>N+ACD</sup> protein; Lane 5, purified recombinant His-OsHSP20<sup>ACD+C</sup> protein; Lane 6, purified recombinant His-OsHSP20<sup>Full</sup> protein. The specific mass (in kDa) of the molecular weight markers is indicated on the left.

**Figure S2** Cell viability of *E. coli* BL21 containing the empty vector pET32a(+) and transformants grown on LB medium after treatment with heat (50 °C) (A) or salt (800 mM NaCl) (B) stresses for different times.

**Figure S3** Western blot analysis with an anti-HSP20 polyclonal antibody demonstrating the presence of the recombinant protein in the *P. pastoris* strain SMD1168 cells. Proteins were extracted from *P. pastoris* cell cultures that were cultivated in buffered methanol complex medium until the optical density at 600 nm (OD<sub>600</sub>) reached 1.4. Antibodies were used in dilutions of 1:5000. M, protein molecular weight marker - the specific mass (in kDa) of the molecular weight marker is indicated on the left; pPIC3.5K, SMD1168 cells carrying empty vector; N, SMD1168 cells carrying vector pPIC3.5K-OsHSP20<sup>N</sup>; ACD, SMD1168 cells carrying vector pPIC3.5K-OsHSP20<sup>ACD</sup>; C, SMD1168 cells carrying vector pPIC3.5K-OsHSP20<sup>C</sup>; N+ACD, SMD1168 cells carrying vector pPIC3.5K-OsHSP20<sup>N+ACD</sup>; ACD+C, SMD1168 cells carrying vector pPIC3.5K-OsHSP20<sup>ACD+C</sup>; Full, SMD1168 cells carrying vector pPIC3.5K-OsHSP20<sup>Full</sup>.

**Figure S4** qRT-PCR and western blot analysis of transgenic OsHSP20 rice lines. (A) qRT-PCR analysis. Total RNA was extracted from leaves of 4-week-old WT and T2 generation transgenic OsHSP20 rice. The *OsUBCE2* (LOC\_Os02g42314) gene was used as an internal control. (B) Western blot analysis using an anti-HSP20 polyclonal antibody. Proteins were extracted from leaves of 4-week-old WT and T2 generation transgenic OsHSP20 rice. Western blot analysis using anti-Actin monoclonal antibody was used as an internal control. Antibodies were used in dilutions of 1:5000. WT, wild-type; Ubi:OsHSP20-L5, -L16 and -L20, three transgenic rice lines.

**Figure S5** Integral blots of Figure 1E for detection of OsHSP20 in rice seedlings following heat stress (45 °C), in which the exposure time is 20 s for OsHSP20 protein (A) and 30 s for Actin (B).

**Figure S6** Integral blots of Figure 1F for detection of OsHSP20 in rice seedlings following salinity stress (50 mM NaCl), in which the exposure time is 150 s for OsHSP20 protein (A) and 30 s for Actin (B).

**Figure S7** Integral blots of Figure S4B for detection of OsHSP20 in transgenic rice plants, in which the exposure time is 30 s for both OsHSP20 protein (A) and Actin (B).

Figure S1

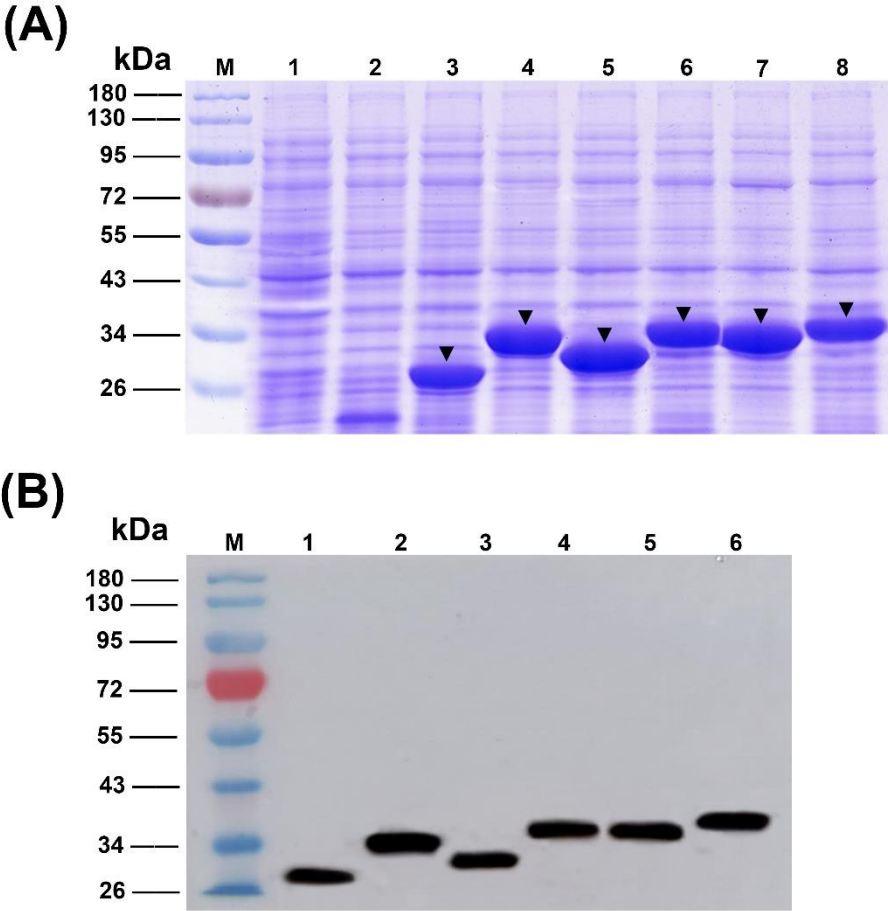

Figure S2

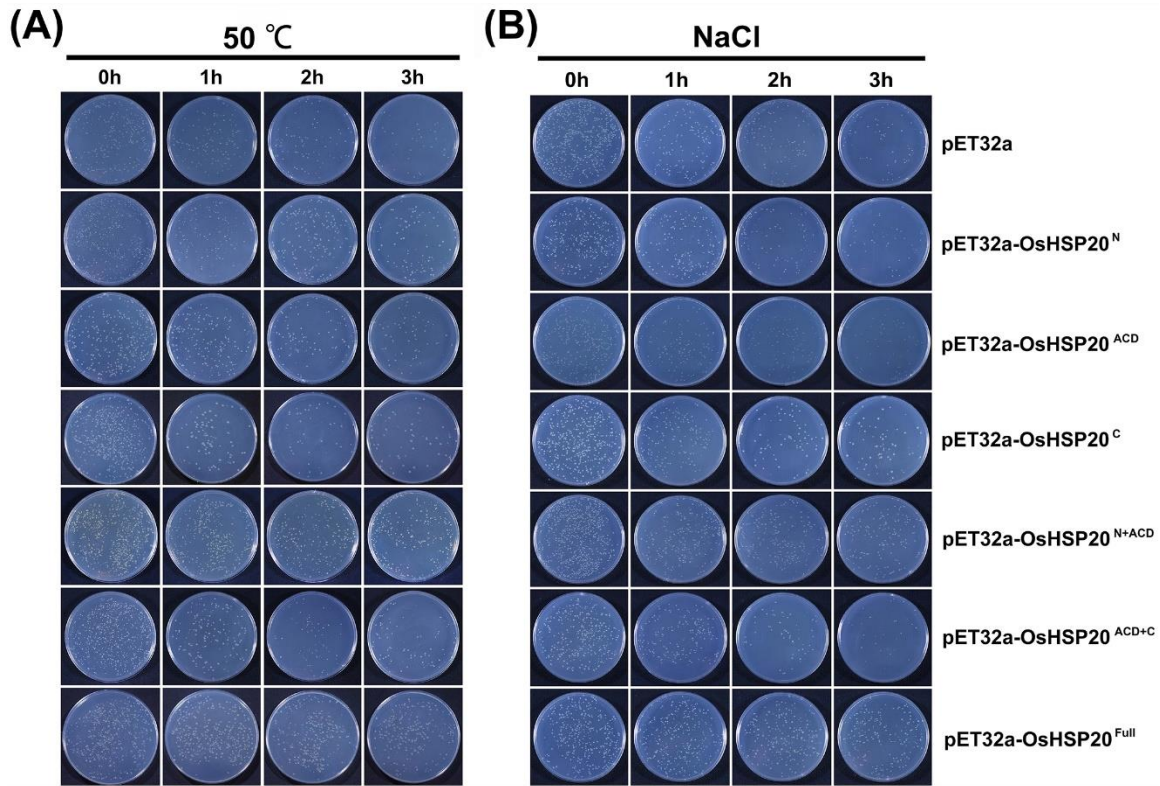

Figure S3

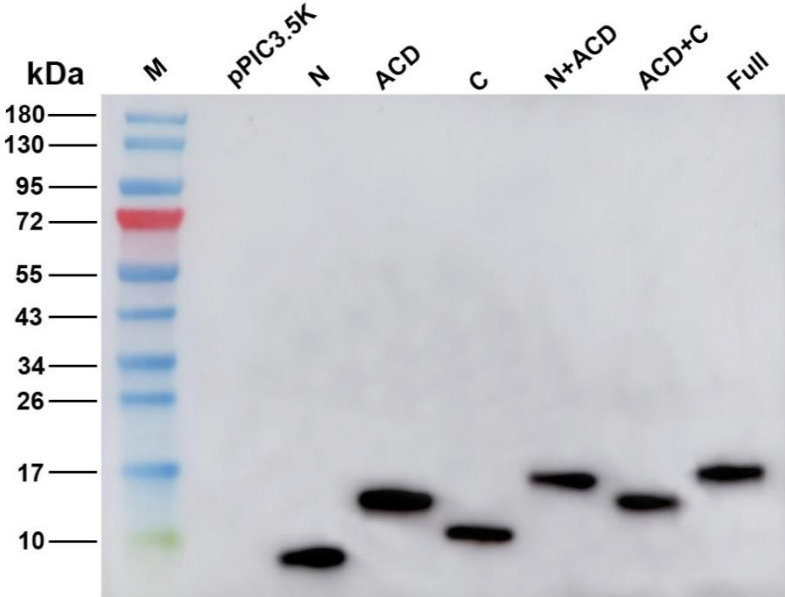

Figure S4

(A)

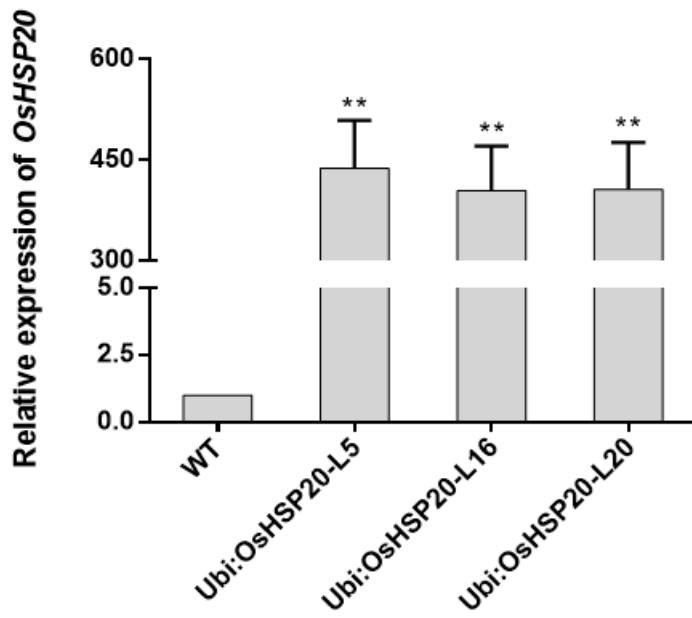

(B)

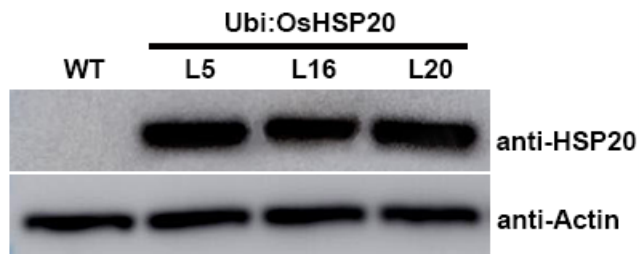



Figure S5

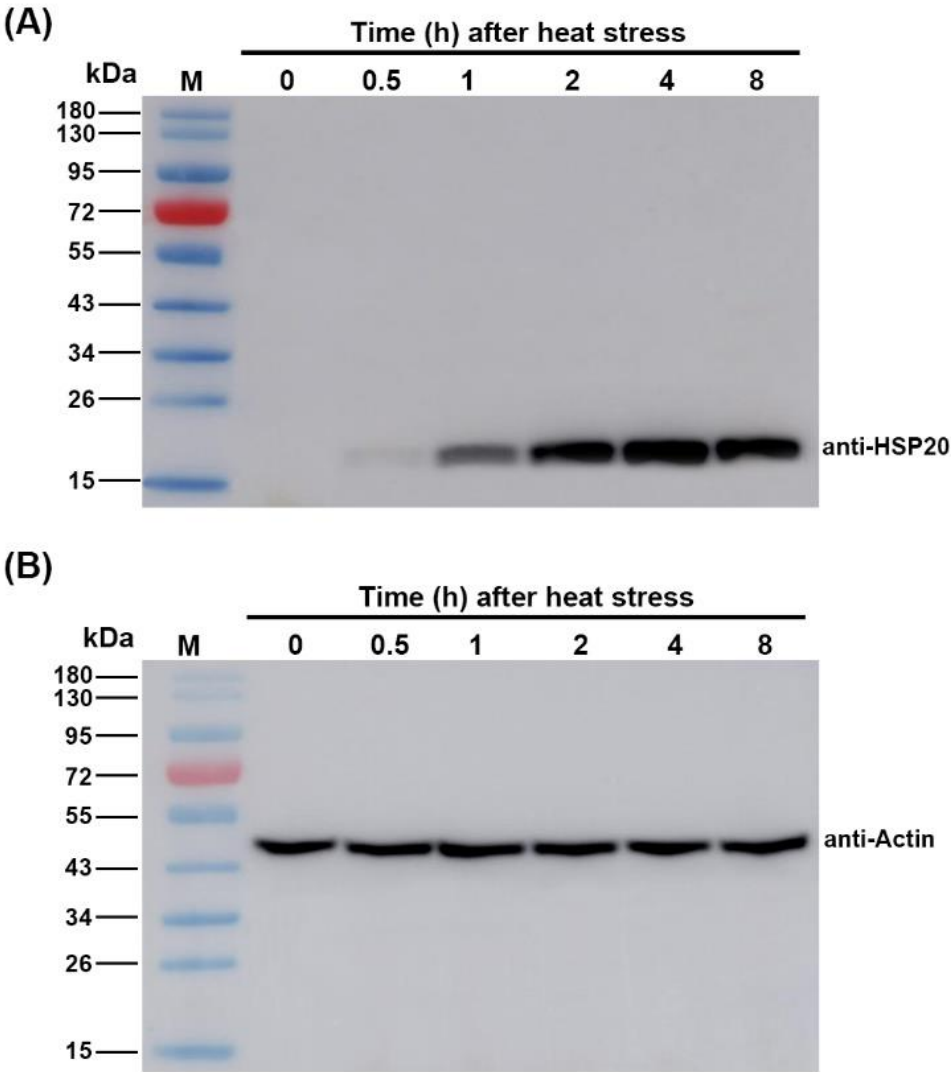

Figure S6

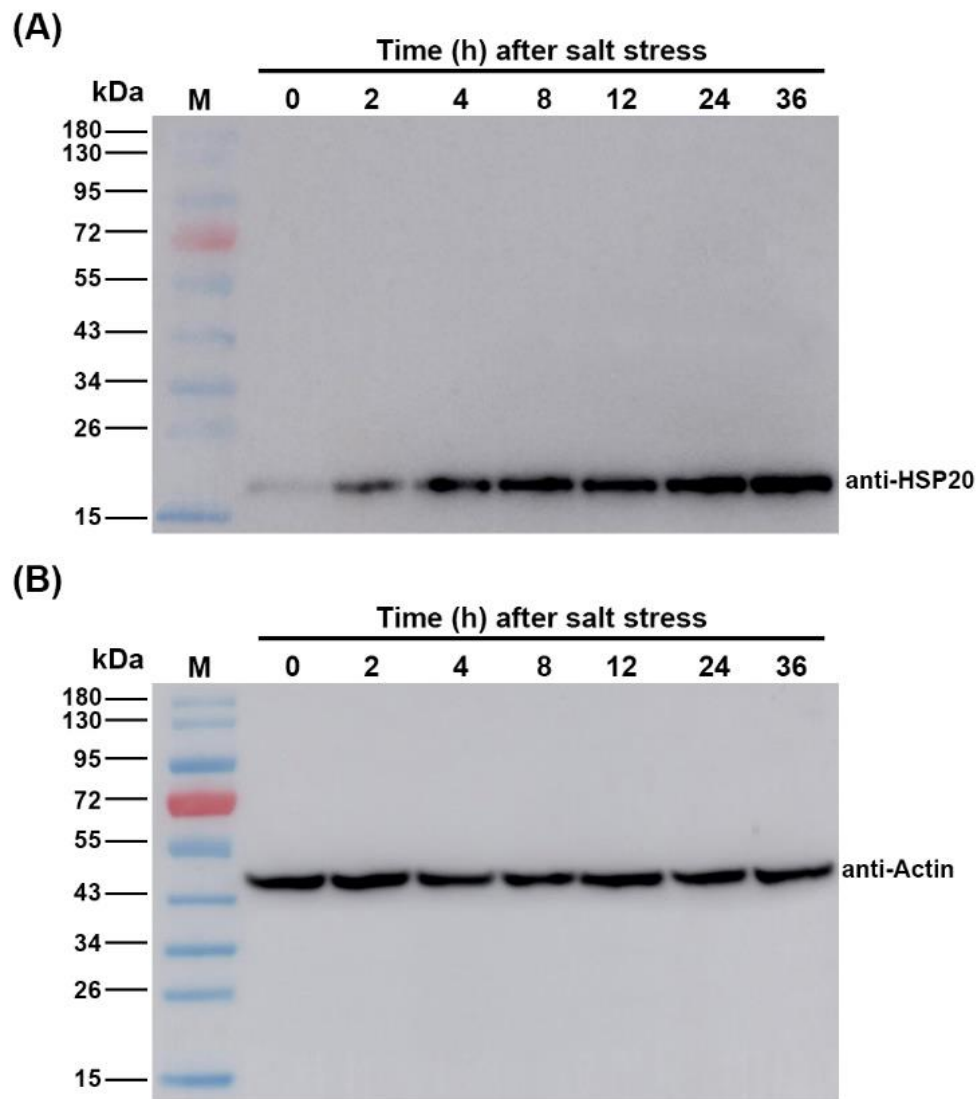

Figure S7

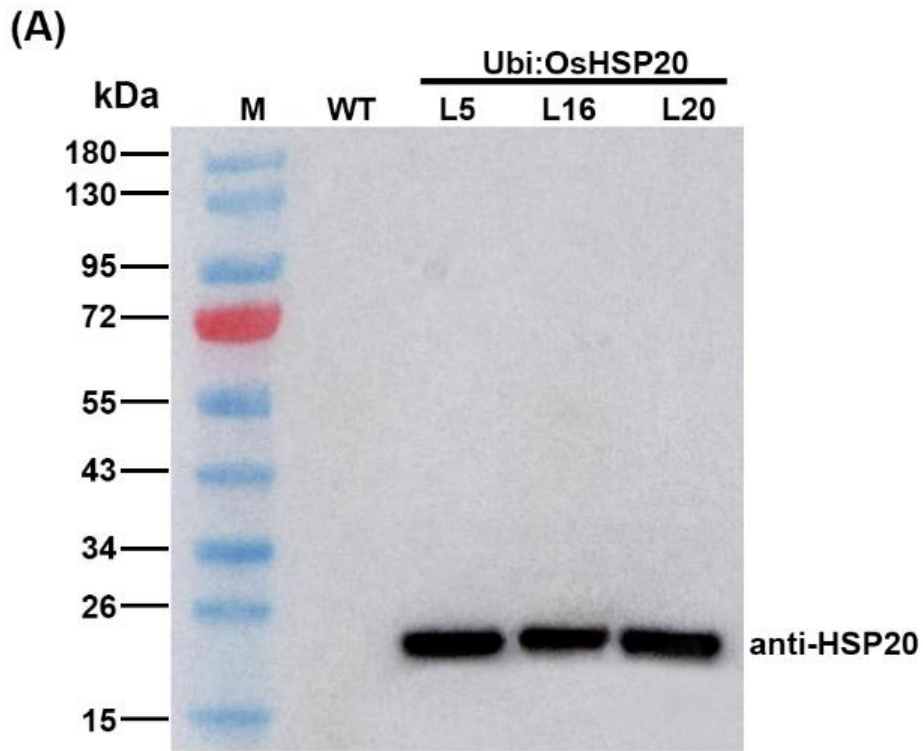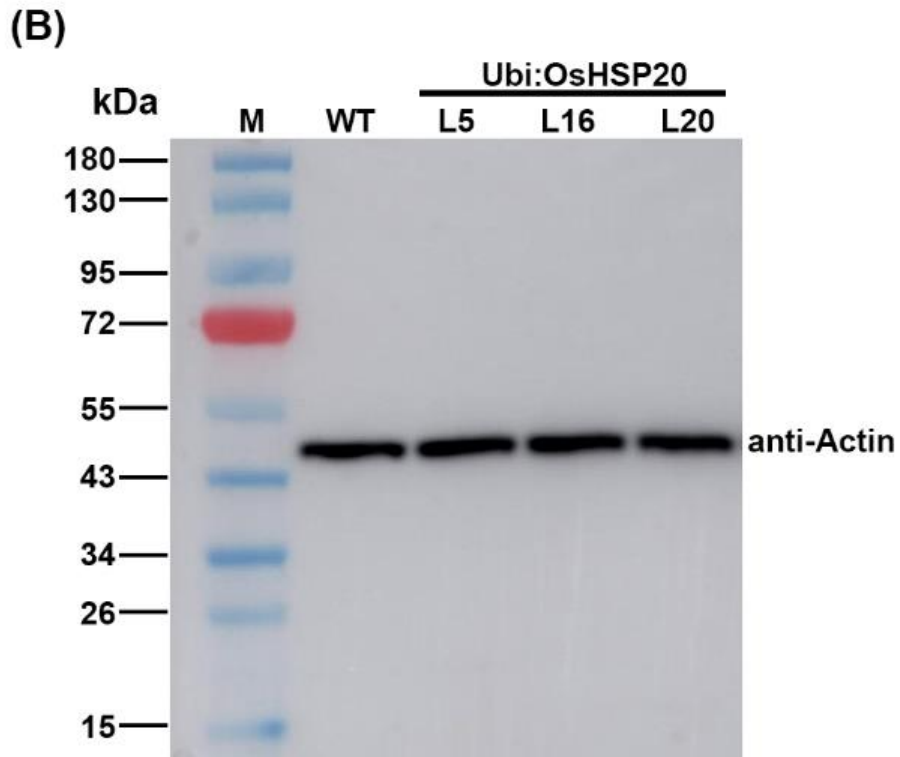

Supplement: 41598_2020_58395_MOESM1_ESM.pdf [file 41598_2020_58395_MOESM1_ESM.pdf]
